# Supplementary material
Source: PubMed Central journal article supplement (PMC9706401)
Supplement: jamainternmed-e225431-s001.pdf [file jamainternmed-e225431-s001.pdf]

## Supplementary Online Content

Cron DC, Worsham CM, Adler JT, Bray CF, Jena AB. Organ donation and transplants during major US motorcycle rallies. *JAMA Intern Med*. Published online November 28, 2022.  
doi:10.1001/jamainternmed.2022.5431

**eTable 1.** Motorcycle Rally Locations and Dates

**eTable 2.** Adjusted Number of Organ Donors and Organ Transplants Per Day Per Region, for Motorcycle Rally Dates Compared With Non-Rally Dates

**eFigure 1.** Comparison of Observed Effect Sizes to Effect Sizes Obtained From a Simulation of Randomly Assigned “Pseudo-Rally” Dates

This supplementary material has been provided by the authors to give readers additional information about their work.

**eTable 1. Motorcycle Rally Locations and Dates**

| <b>Event</b>       | <b>Sturgis Motorcycle Rally</b> | <b>Daytona Bike Week</b> | <b>Laconia Motorcycle Week</b> | <b>Myrtle Beach Bike Week Spring Rally</b> | <b>Atlantic Beach Bikefest (Black Bike Week)</b> | <b>Republic of Texas Biker Rally</b> | <b>Bikes Blues &amp; BBQ</b> |
|--------------------|---------------------------------|--------------------------|--------------------------------|--------------------------------------------|--------------------------------------------------|--------------------------------------|------------------------------|
| <b>Location</b>    | Sturgis, SD                     | Daytona Beach, FL        | Laconia, NH                    | Myrtle Beach, SC                           | Myrtle Beach, SC                                 | Austin, TX                           | Fayetteville, AR             |
| <b>Attendance*</b> | 500,000                         | 500,000                  | 400,000                        | 500,000                                    | 400,000                                          | 200,000                              | 400,000                      |
| <b>Year</b>        |                                 |                          |                                |                                            |                                                  |                                      |                              |
| 2021               | 8/6-8/15                        | 3/5-3/14                 | 6/12-6/20                      | 5/7-5/16                                   | None                                             | 6/10-6/13                            | 9/22-9/25                    |
| 2020               | 8/7-8/16                        | 3/6-3/15                 | 8/22-8/30                      | 7/13-7/19                                  | None                                             | None                                 | None                         |
| 2019               | 8/2-8/11                        | 3/8-3/17                 | 6/8-6/16                       | 5/10-5/19                                  | 5/24-5/27                                        | 6/13-6/16                            | 9/25-9/28                    |
| 2018               | 8/3-8/12                        | 3/9-3/18                 | 6/9-6/17                       | 5/11-5/20                                  | 5/25-5/28                                        | 6/7-6/10                             | 9/26-9/29                    |
| 2017               | 8/4-8/13                        | 3/10-3/19                | 6/10-6/18                      | 5/12-5/21                                  | 5/26-5/29                                        | 6/8-6/11                             | 9/20-9/23                    |
| 2016               | 8/8-8/14                        | 3/4-3/13                 | 6/11-6/19                      | 5/13-5/22                                  | 5/27-5/30                                        | 6/9-6/12                             | 9/21-9/24                    |
| 2015               | 8/3-8/9                         | 3/6-3/15                 | 6/13-6/21                      | 5/12-5/16                                  | 5/22-5/25                                        | 6/11-6/14                            | 9/22-9/25                    |
| 2014               | 8/2-8/9                         | 3/7-3/16                 | 6/14-6/22                      | 5/12-5/18                                  | 5/23-5/26                                        | 6/12-6/15                            | 9/24-9/27                    |
| 2013               | 8/5-8/11                        | 3/8-3/17                 | 6/8-6/16                       | 5/10-5/19                                  | 5/24-5/27                                        | 6/13-6/16                            | 9/18-9/21                    |
| 2012               | 8/4-8/12                        | 3/9-3/18                 | 6/9-6/17                       | 5/11-5/20                                  | 5/25-5/28                                        | 6/7-6/10                             | 9/26-9/29                    |
| 2011               | 8/8-8/14                        | 3/4-3/13                 | 6/11-6/19                      | 5/12-5/22                                  | 5/26-5/31                                        | 6/9-6/12                             | 9/28-10/1                    |
| 2010               | 8/9-8/15                        | 2/26-3/7                 | 6/12-6/20                      | 5/10-5/16                                  | 5/27-5/31                                        | 6/10-6/13                            | 9/29-10/2                    |
| 2009               | 8/3-8/9                         | 2/27-3/8                 | 6/13-6/21                      | None                                       | 5/21-5/25                                        | 6/11-6/14                            | 9/23-9/26                    |
| 2008               | 8/4-8/10                        | 2/29-3/10                | 6/14-6/22                      | 5/9-5/18                                   | 5/23-5/26                                        | 6/12-6/15                            | 9/24-9/27                    |
| 2007               | 8/6-8/12                        | 3/2-3/11                 | 6/9-6/17                       | 5/11-5/20                                  | 5/24-5/27                                        | 5/31-6/3                             | 10/3-10/6                    |
| 2006               | 8/7-8/13                        | 3/3-3/12                 | 6/10-6/18                      | 5/12-5/21                                  | 5/26-5/29                                        | 6/1-6/4                              | 9/27-9/30                    |
| 2005               | 8/8-8/14                        | 3/4-3/13                 | 6/11-6/19                      | 5/16-5/22                                  | 5/27-5/30                                        | 6/2-6/5                              | 9/28-10/1                    |

**Notes:** \*Attendance is estimated annual attendance.

**eTable 2.** Adjusted Number of Organ Donors and Organ Transplants Per Day Per Region, For Motorcycle Rally Dates Compared With Non-Rally Dates

| Variable                           | Outcome: # organ donors per region per day |              |         |                 |              |         | Outcome: # transplant recipients per region per day |              |         |                 |              |         |
|------------------------------------|--------------------------------------------|--------------|---------|-----------------|--------------|---------|-----------------------------------------------------|--------------|---------|-----------------|--------------|---------|
|                                    | Rally regions                              |              |         | Control regions |              |         | Rally regions                                       |              |         | Control regions |              |         |
|                                    | Estimate                                   | 95% CI       | P-value | Estimate        | 95% CI       | P-value | Estimate                                            | 95% CI       | P-value | Estimate        | 95% CI       | P-value |
| <b>Weeks relative to Bike Week</b> |                                            |              |         |                 |              |         |                                                     |              |         |                 |              |         |
| 4 weeks before                     | 0.34                                       | (0.30, 0.38) | 0.01    | 0.31            | (0.29, 0.34) | 0.45    | 1.14                                                | (0.99, 1.29) | <0.01   | 1.09            | (0.99, 1.18) | 0.58    |
| 3 weeks before                     | 0.33                                       | (0.29, 0.37) | <0.01   | 0.32            | (0.30, 0.35) | 0.90    | 1.14                                                | (0.99, 1.28) | <0.01   | 1.10            | (1.01, 1.19) | 0.70    |
| 2 weeks before                     | 0.34                                       | (0.30, 0.39) | 0.02    | 0.30            | (0.28, 0.32) | 0.16    | 1.11                                                | (0.97, 1.26) | <0.01   | 1.05            | (0.96, 1.13) | 0.22    |
| 1 week before                      | 0.34                                       | (0.30, 0.38) | <0.01   | 0.31            | (0.29, 0.33) | 0.32    | 1.15                                                | (1.00, 1.30) | <0.01   | 1.06            | (0.97, 1.14) | 0.25    |
| <b>Motorcycle rally (Ref.)</b>     | 0.42                                       | (0.37, 0.46) | ---     | 0.32            | (0.30, 0.35) | ---     | 1.47                                                | (1.31, 1.64) | ---     | 1.12            | (1.03, 1.21) | ---     |
| 1 week after                       | 0.36                                       | (0.32, 0.40) | 0.07    | 0.30            | (0.28, 0.32) | 0.13    | 1.21                                                | (1.05, 1.36) | 0.02    | 1.04            | (0.95, 1.13) | 0.18    |
| 2 weeks after                      | 0.36                                       | (0.32, 0.40) | 0.05    | 0.31            | (0.28, 0.33) | 0.35    | 1.24                                                | (1.08, 1.39) | 0.04    | 1.07            | (0.98, 1.17) | 0.46    |
| 3 weeks after                      | 0.34                                       | (0.30, 0.37) | <0.01   | 0.30            | (0.27, 0.32) | 0.08    | 1.21                                                | (1.06, 1.36) | 0.02    | 1.03            | (0.94, 1.11) | 0.14    |
| 4 weeks after                      | 0.32                                       | (0.28, 0.36) | <0.01   | 0.30            | (0.27, 0.33) | 0.18    | 1.12                                                | (0.98, 1.26) | <0.01   | 1.06            | (0.97, 1.16) | 0.40    |

**Notes:** Estimates were obtained from a single multivariable Poisson regression model adjusting for OPTN region, day of week, week of year, and year. The main independent variables were indicators for week relative to rally week in a given region, and an interaction term was included to estimate the effects for rally vs. control regions. The p-values compare each estimate to the reference (motorcycle rally week). Control regions were the OPTN regions not sharing a border with a motorcycle rally's region. These estimates were used to make Figures 2A and 2B in the main article.

**eFigure 1.** Comparison of Observed Effect Sizes to Effect Sizes Obtained From a Random Permutation Simulation of Randomly Assigned “Placebo Rally” Dates

**A.** Distribution of random permutation effect sizes for number of organ donors

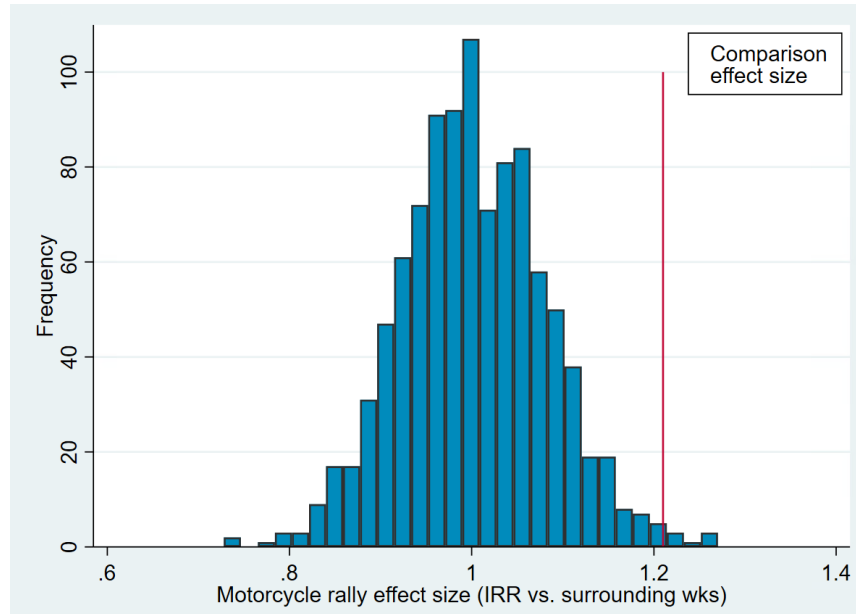

**B.** Distribution of random permutation effect sizes for number of transplant recipients

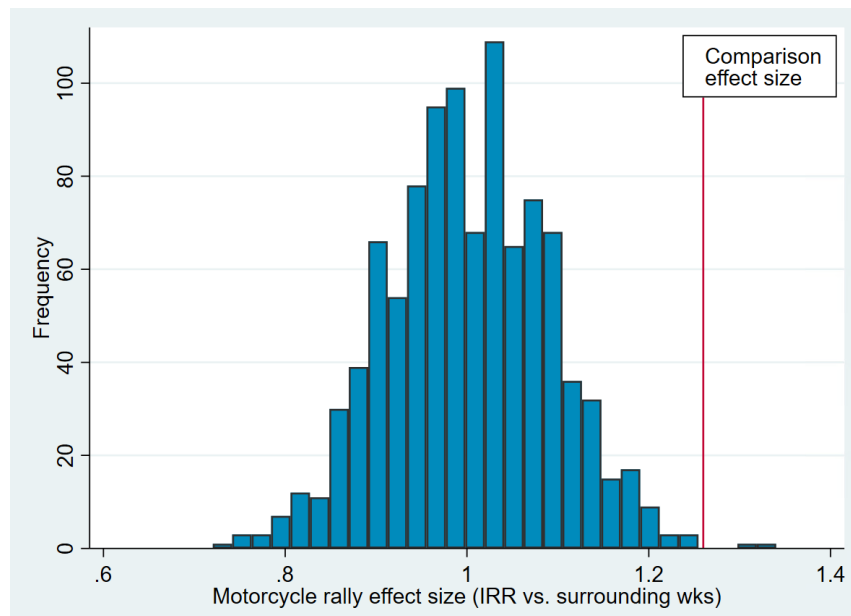

**Notes:** These figures show the results of a random permutation sensitivity analysis in which we assigned random “placebo rally” weeks to motorcycle rally-containing regions and estimated our baseline models (the effect size of motorcycle rally on number of organ donors or transplant recipients) for 1,000 iterations. Panel A shows the distribution of adjusted incidence rate ratios (IRRs) produced from this simulation for the outcome of number of organ donors per region-day. Panel B shows the distribution of adjusted IRRs produced from this simulation for the outcome of number of transplant recipients per region-day. The vertical line in each figure shows our observed

effect size for comparison. This simulation produced an effect size greater than our observed effect size in only 7 out of 1,000 iterations for number of organ donors and 2 out of 1,000 iterations for number of transplant recipients.
